# Supplementary material for: Synthesis of three-dimensional hyperbranched TiO2nanowire arrays with significantly enhanced photoelectrochemical hydrogen production
Source: Royal Society of Chemistry journal article supplement (doi:10.1039/c4ta06498d), 2015-01-01
Supplement: c4ta06498d1.pdf [file c4ta06498d1.pdf]

## Electronic Supplementary Information

### Synthesis of three-dimensional hyperbranched TiO<sub>2</sub> nanowire arrays with significantly enhanced photoelectrochemical hydrogen production

Zhenghui Pan, Yongcai Qiu,\* Jie Yang, Meinan Liu, Lisha Zhou, Yijun Xu, Leimei Sheng, Xinluo Zhao\*, and Yuegang Zhang\*

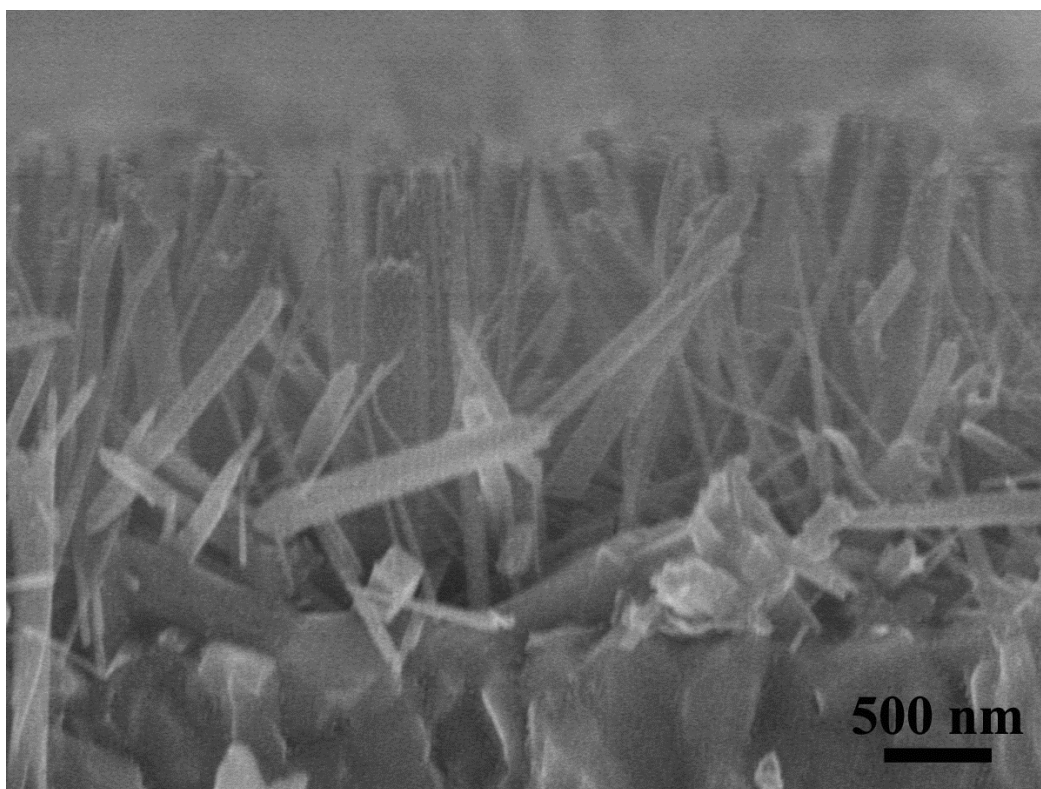

**Figure S1.** Cross-sectional SEM view of the TiO<sub>2</sub> NWs.

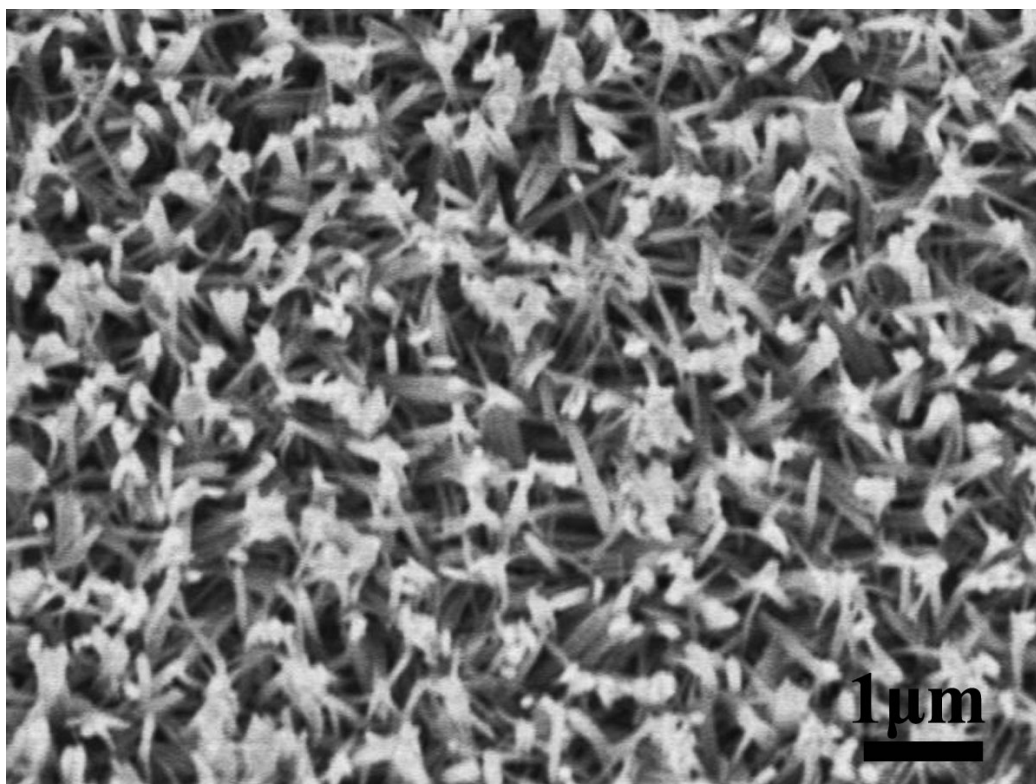

**Figure S2.** Top view SEM view of the TiO<sub>2</sub> seeded NWs.

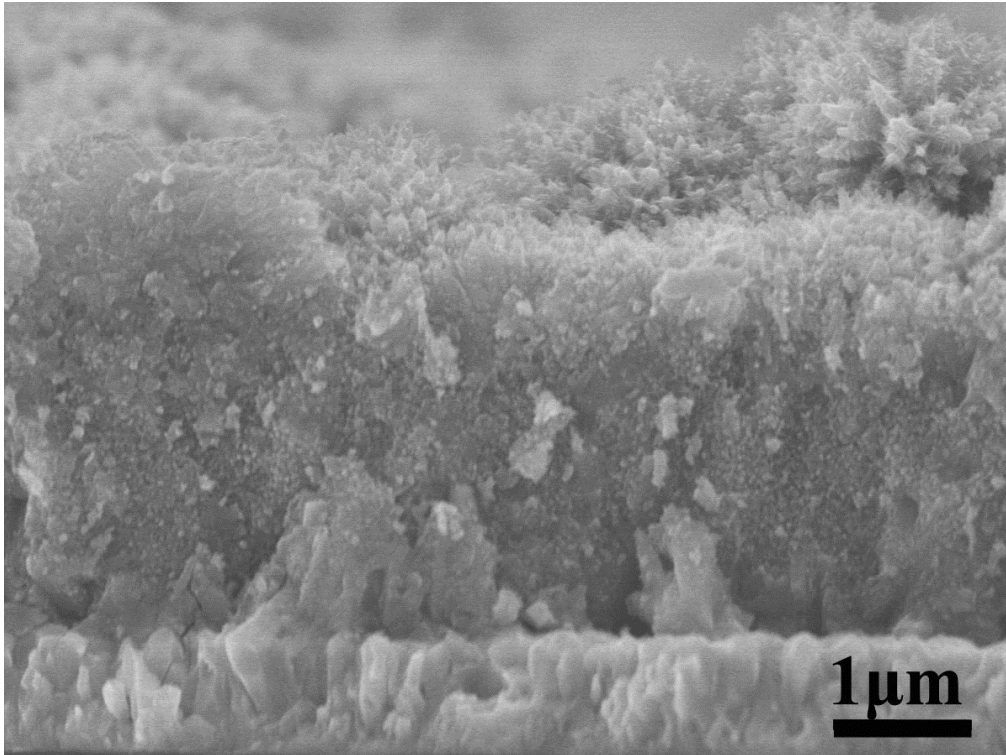

**Figure S3.** Cross-sectional view of the hyperbranched hierarchical TiO<sub>2</sub> nanowires.

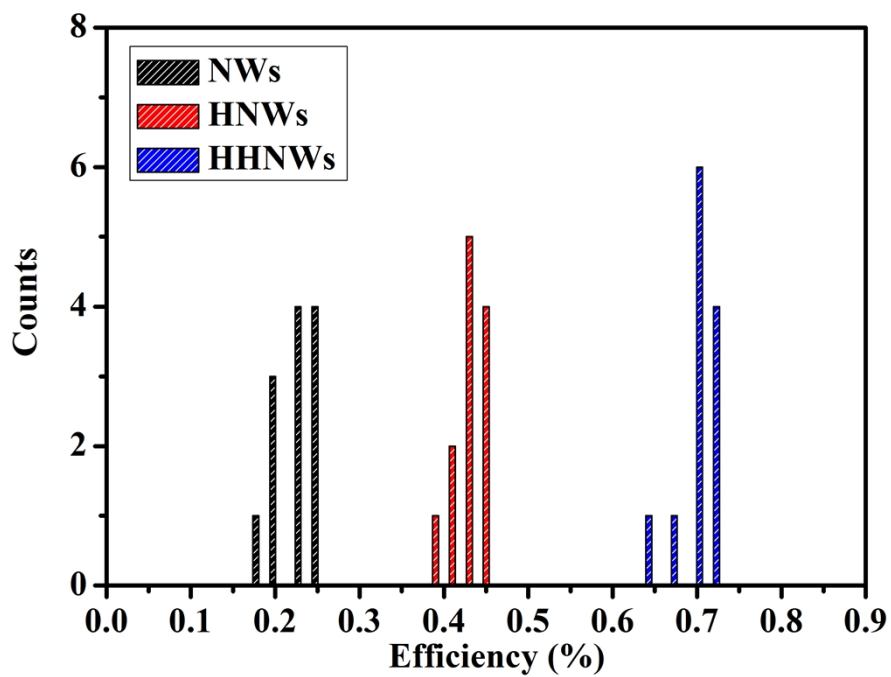

**Figure S4.** The efficiency distributions of NWs, HNWs, and HHNWs on FTO substrates over 10 devices measurements.

Table S1: Summary of BET specific surface areas and Roughness factor of TiO<sub>2</sub> NWs, HNWs, and HHNWs. (Roughness factor = S \* m), where S is BET surface area; m is Mass per unit area)

| Sample | Surface area (m <sup>2</sup> g <sup>-1</sup> ) | Roughness factor |
|--------|------------------------------------------------|------------------|
| NWs    | 7.1                                            | 73.8             |
| HNWs   | 13.4                                           | 149.6            |
| HHNWs  | 108.6                                          | 4072.3           |
